# Supplementary material
Source: ML conference proceedings conference paper supplement (https://proceedings.mlr.press/v164/li22e.html)
Supplement: Supplementary file 1 [file li22e-supp.zip]

Archive with 2 entries (2 files):
- Embodied_Semantic_Scene_Graph_Generation__Supplementary (7).pdf
- __MACOSX/._Embodied_Semantic_Scene_Graph_Generation__Supplementary (7).pdf
